# Supplementary material
Source: PubMed Central journal article supplement (PMC5544524)
Supplement: NIHMS877128-supplement-1.pdf [file NIHMS877128-supplement-1.pdf]

**Appendix**  
**Evaluation of a Personalized, Web-Based Decision Aid for Lung Cancer Screening**  
**Lau et al.**

**Appendix Table 1.** Question-Specific Knowledge Scores<sup>a</sup>

|                                                                                                                                                                                                                                         | Before [n (%)]  |                   |                          | After [n (%)]   |                   |             | <i>p</i> -value |
|-----------------------------------------------------------------------------------------------------------------------------------------------------------------------------------------------------------------------------------------|-----------------|-------------------|--------------------------|-----------------|-------------------|-------------|-----------------|
|                                                                                                                                                                                                                                         | True            | False             | Total score <sup>b</sup> | True            | False             | Total score |                 |
| Question 1. Factors that increase chances of developing lung cancer include:                                                                                                                                                            |                 |                   | 3.77 (0.95)              |                 |                   | 4.67 (1.05) | < 0.001         |
| Smoking                                                                                                                                                                                                                                 | 59 (100%)       | 0                 |                          | 60 (100%)       | 0                 |             | -               |
| Family history                                                                                                                                                                                                                          | <b>45 (76%)</b> | 14 (24%)          |                          | <b>55 (92%)</b> | 5 (8%)            |             | 0.006           |
| Flu                                                                                                                                                                                                                                     | 22 (37%)        | <b>38 (63%)</b>   |                          | 18 (30%)        | <b>42 (70%)</b>   |             | 0.42            |
| Chronic obstructive pulmonary disease (COPD)                                                                                                                                                                                            | <b>40 (67%)</b> | 20 (33%)          |                          | <b>51 (85%)</b> | 9 (15%)           |             | 0.007           |
| Age                                                                                                                                                                                                                                     | <b>29 (48%)</b> | 31 (52%)          |                          | <b>45 (75%)</b> | 15 (25%)          |             | < 0.001         |
| Alcohol                                                                                                                                                                                                                                 | 45 (75%)        | <b>15 (25%)</b>   |                          | 32 (54%)        | <b>27 (46%)</b>   |             | 0.004           |
| Question 2. Possible benefits of lung cancer screening are:                                                                                                                                                                             |                 |                   | 1.95 (0.77)              |                 |                   | 2.7 (0.56)  | < 0.001         |
| It can cure cancer.                                                                                                                                                                                                                     | 13 (22%)        | <b>47 (78%)</b>   |                          | 8 (13%)         | <b>52 (87%)</b>   |             | 0.18            |
| It lowers your chances of dying from lung cancer.                                                                                                                                                                                       | <b>48 (80%)</b> | 12 (20%)          |                          | <b>57 (95%)</b> | 3 (5%)            |             | 0.01            |
| It lowers your chances of developing lung nodules.                                                                                                                                                                                      | 38 (63%)        | <b>22 (37%)</b>   |                          | 7 (12%)         | <b>53 (88%)</b>   |             | < 0.001         |
| Question 3. Possible harms of lung cancer screening include:                                                                                                                                                                            |                 |                   | 1.2 (0.99)               |                 |                   | 2.23 (1)    | < 0.001         |
| You may find some things in your lungs that are not cancer but would need an extra test to check.                                                                                                                                       | <b>43 (72%)</b> | 17 (28%)          |                          | <b>51 (85%)</b> | 9 (15%)           |             | 0.08            |
| You may need to get an extra test which can cause complications.                                                                                                                                                                        | <b>17 (28%)</b> | 43 (72%)          |                          | <b>44 (73%)</b> | 16 (27%)          |             | < 0.001         |
| There are no harms associated with screening.                                                                                                                                                                                           | 48 (80%)        | <b>12 (20%)</b>   |                          | 21 (35%)        | <b>39 (65%)</b>   |             | < 0.001         |
| Question 4. <sup>c</sup> Indicate whether the following individuals would be eligible for screening based on their age. Select yes for eligible, no for ineligible, or unsure. They all meet the smoking status and pack-year criteria. |                 |                   | 0.52 (0.21)              |                 |                   | 0.75 (0.25) | < 0.001         |
|                                                                                                                                                                                                                                         | <i>Eligible</i> | <i>Ineligible</i> |                          | <i>Eligible</i> | <i>Ineligible</i> |             |                 |
| 45 years old                                                                                                                                                                                                                            | 57 (95%)        | <b>3 (5%)</b>     |                          | 25 (42%)        | <b>35 (58%)</b>   |             | < 0.001         |
| 55 years old                                                                                                                                                                                                                            | <b>50 (83%)</b> | 10 (17%)          |                          | <b>54 (90%)</b> | 6 (10%)           |             | 0.39            |
| 60 years old                                                                                                                                                                                                                            | <b>52 (87%)</b> | 8 (13%)           |                          | <b>54 (90%)</b> | 6 (10%)           |             | 0.73            |
| 95 years old                                                                                                                                                                                                                            | 40 (67%)        | <b>20 (33%)</b>   |                          | 23 (38%)        | <b>37 (62%)</b>   |             | < 0.001         |

**Appendix**  
**Evaluation of a Personalized, Web-Based Decision Aid for Lung Cancer Screening**  
**Lau et al.**

|                                                                                                         | Before [n (%)] |       |                          | After [n (%)]   |       |             | <i>p</i> -value |
|---------------------------------------------------------------------------------------------------------|----------------|-------|--------------------------|-----------------|-------|-------------|-----------------|
|                                                                                                         | True           | False | Total score <sup>b</sup> | True            | False | Total score |                 |
| Question 5. What percentage of lumps found on your lungs by the CT screening is NOT going to be cancer? |                |       |                          |                 |       |             |                 |
| More than 90%                                                                                           | <b>5 (8%)</b>  |       |                          | <b>35 (58%)</b> |       |             | < 0.001         |
| 50-60%                                                                                                  | 7 (12%)        |       |                          | 7 (12%)         |       |             |                 |
| 10-20%                                                                                                  | 8 (13%)        |       |                          | 7 (12%)         |       |             |                 |
| Less than 5%                                                                                            | 3 (5%)         |       |                          | 4 (7%)          |       |             |                 |
| Don't know/Not sure                                                                                     | 37 (62%)       |       |                          | 7 (12%)         |       |             |                 |

<sup>a</sup> Figures corresponding to the correct responses per question are bolded. Each correct response is assigned a score of 1. Incorrect responses also include those who responded “Unsure”.

<sup>b</sup> The mean total score is reported with the corresponding standard deviation in parentheses.

<sup>c</sup> Question 4 was weighted to have a total score of 1.

**Appendix**  
**Evaluation of a Personalized, Web-Based Decision Aid for Lung Cancer Screening**  
**Lau et al.**

**Appendix Table 2.** Comparing Two Measures of Concordance<sup>a</sup>

| Questions                                                                  | Eligible for screening <sup>b</sup> |           | Not eligible for screening<br>(n=49) |                    |
|----------------------------------------------------------------------------|-------------------------------------|-----------|--------------------------------------|--------------------|
|                                                                            | Before                              | After     | Before                               | After              |
|                                                                            | N (%)                               |           | N (%)                                |                    |
| 1) Which option do you prefer right now in terms of lung cancer screening? |                                     |           |                                      |                    |
| I prefer to screen                                                         | 7 (70%)                             | 9 (90%)   | 31 (63.27%)                          | 20 (40.82%)        |
| I prefer not to screen                                                     | 0                                   | 1 (10%)   | 7 (14.29%)                           | 26 (53.06%)        |
| Unsure                                                                     | 3 (30%)                             | 0         | 11 (22.45%)                          | 3 (6.12%)          |
| 2) If getting CT screening was free for you, would you get screened? (Yes) | 11 (100%)                           | 11 (100%) | 46 (93.88%)                          | 34 (69.39%)        |
| Concordance using 1) <sup>c</sup>                                          | 7 (70%)                             | 9 (90%)   | 7 (14.29%)                           | <b>26 (53.06%)</b> |
| Concordance using 2)                                                       | 11 (100%)                           | 11 (100%) | 3 (6.12%)                            | <b>15 (30.61%)</b> |

<sup>a</sup> Boldface indicates statistical significance ( $p < 0.001$ ) for outcome of interest, concordance.

<sup>b</sup> n=10 for those eligible for lung cancer screening in question 1), whereas n=11 for question 2).

<sup>c</sup> Figures for “Concordance using 1)” are quoted in text. “Concordance using 2)” is provided as an alternative for comparison.
